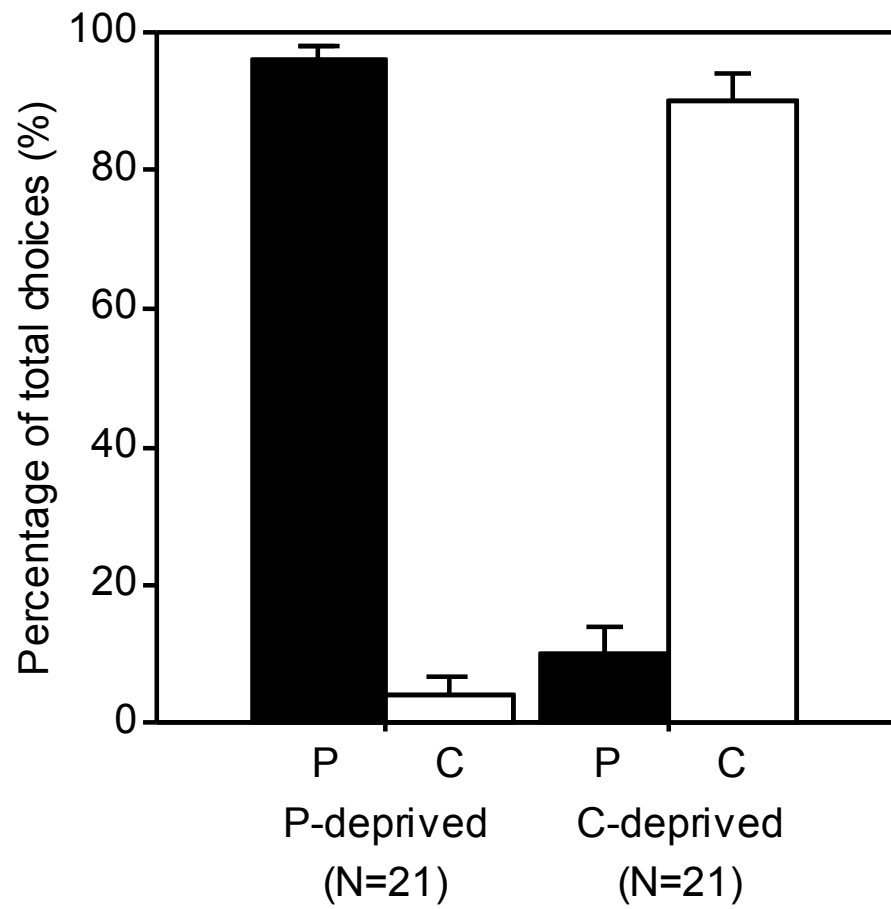

Fig. S1. When given a choice between a food high in protein (35P:7C) or one high in carbohydrate (7P:35C), locusts in either a carbohydrate- or protein-deprived state selected the nutritional complement.

**Table S1.** Chemistry of both grasses over the duration of the experiment. Replicates are days (n= 9) with all parameters determined from five separate samples per day. Values given are for means  $\pm$  SEM and *P* values from ANOVA.

|                                      | <i>T. triandra</i> | <i>P</i> | <i>T. aestivum</i> | <i>P</i> |
|--------------------------------------|--------------------|----------|--------------------|----------|
| <i>Parameter</i>                     |                    |          |                    |          |
| Water (g.g <sup>-1</sup> dry matter) | 1.6 $\pm$ 0.02     | 0.338    | 7.8 $\pm$ 0.06     | 0.361    |
| Protein                              | 7.9 $\pm$ 0.4      | 0.124    | 13.4 $\pm$ 0.5     | 0.102    |
| Non-structural carbohydrate          | 23.7 $\pm$ 0.5     | 0.733    | 12.8 $\pm$ 0.4     | 0.571    |
| Ratio P:C                            | 1:2.9              | 0.230    | 1:0.9              | 0.137    |

**Table S2.** Water loss and metabolic changes of the grass blades after 24h at 32°C and 38°C. Metabolic changes, in terms of total dry mass, protein and carbohydrate were quantified after Bowers et al. (1991) except that the dry mass initially was calculated from a regression of fresh mass against dry mass for a known sample rather than a ratio of fresh mass/dry mass. The values are expressed relative to that predicted from a subset of grasses taken initially (time = 0). A value of 1 indicates no change, while a value greater than 1 indicates the leaf material has gained dry mass (or protein or carbohydrate) compared to that initially predicted, and values less than 1 indicate that there has been a loss. Values given are means  $\pm$  SEM and *P* values are from ANOVA.

| <i>Room temperature</i>     | <b>32°C</b>     | <i>P</i> | <b>38°C</b>     | <i>P</i> |
|-----------------------------|-----------------|----------|-----------------|----------|
| <b><i>T. triandra</i></b>   |                 |          |                 |          |
| <i>Parameter</i>            |                 |          |                 |          |
| Water                       | 0.97 $\pm$ 0.02 | 0.154    | 0.95 $\pm$ 0.02 | 0.137    |
| Total dry matter            | 1.02 $\pm$ 0.02 | 0.406    | 1.00 $\pm$ 0.01 | 0.865    |
| Protein                     | 0.96 $\pm$ 0.03 | 0.215    | 0.96 $\pm$ 0.04 | 0.352    |
| Non-structural carbohydrate | 1.01 $\pm$ 0.03 | 0.810    | 0.97 $\pm$ 0.02 | 0.251    |
| <b><i>T. aestivum</i></b>   |                 |          |                 |          |
| <i>Parameter</i>            |                 |          |                 |          |
| Water                       | 0.97 $\pm$ 0.07 | 0.063    | 0.71 $\pm$ 0.13 | 0.080    |
| Total dry matter            | 1.00 $\pm$ 0.03 | 0.965    | 0.96 $\pm$ 0.03 | 0.069    |
| Protein                     | 0.99 $\pm$ 0.04 | 1.00     | 0.99 $\pm$ 0.04 | 0.391    |
| Non-structural carbohydrate | 0.99 $\pm$ 0.06 | 0.799    | 0.99 $\pm$ 0.07 | 0.215    |

### ***Reference***

Bowers M.D., Stamp N.E. & Fajer E.D. (1991). Factors affecting calculation of nutritional indices for foliage-fed insects: An experimental approach. *Entomol. Exp. Appl.*, 61, 101-116.
